# Supplementary material for: Importance of the many-body effects on the structural properties of the novel iron oxide Fe2O
Source: Royal Society of Chemistry journal article supplement (doi:10.1039/d2cp01089e), 2022-01-01
Supplement: d2cp01089e1.pdf [file d2cp01089e1.pdf]

Cite this: DOI: 00.0000/xxxxxxxxxx

## Supplementary material: Importance of the many-body effects for structural properties of the novel iron oxide: $\text{Fe}_2\text{O}$ <sup>†</sup>

Alexey O. Shorikov,<sup>\*a,b,c</sup> and Sergey V. Streltsov<sup>a,b</sup>

Received Date

Accepted Date

DOI: 00.0000/xxxxxxxxxx

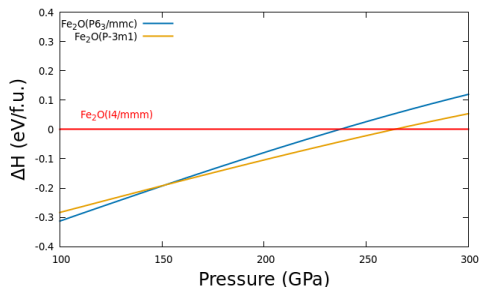

Fig. 1 Plots of relative enthalpy against pressure for  $\text{Fe}_2\text{O}$  as obtained in DFT. The enthalpy of I4/mmm phase is shown as the zero line.

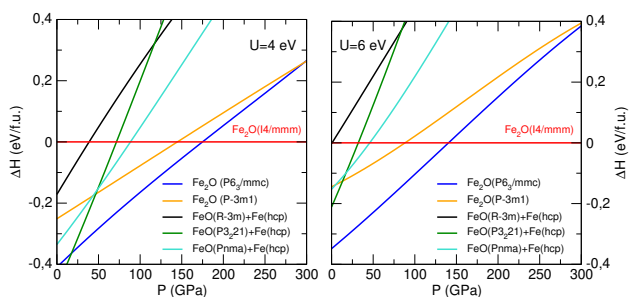

Fig. 2 Plots of relative enthalpy against pressure for  $\text{Fe}_2\text{O}$  and assemblage of FeO and hcp-Fe as obtained in DFT+DMFT at 1000 K calculations for  $U=4$  eV (left panel) and  $U=6$  eV (right panel). The enthalpy of I4/mmm phase is shown as the zero line.

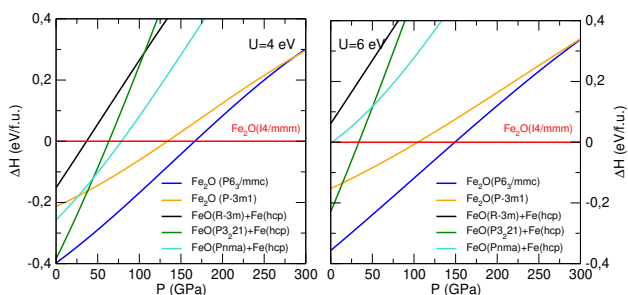

Fig. 3 Plots of relative enthalpy against pressure for  $\text{Fe}_2\text{O}$  and assemblage of FeO and hcp-Fe as obtained in DFT+DMFT at 2000 K calculations for  $U=4$  eV (left panel) and  $U=6$  eV (right panel). The enthalpy of I4/mmm phase is shown as the zero line.

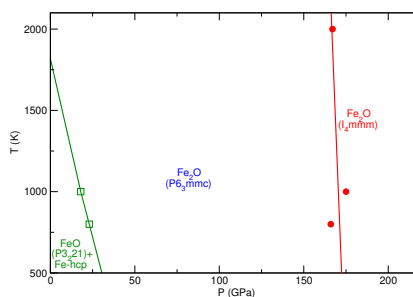

Fig. 4 Phase diagram obtained in DFT+DMFT for  $U=4$  eV. Circles shows the crossing points of  $P6_3/mmc$  and I4/mmm enthalpies at different temperatures. Dashed line is shown as a guide for eyes.

<sup>a</sup> M.N. Miheev Institute of Metal Physics of Ural Branch of Russian Academy of Sciences - 620990 Yekaterinburg, Russia; E-mail: shorikov@imp.uran.ru

<sup>b</sup> Department of theoretical physics and applied mathematics, Ural Federal University, Mira St. 19, 620002 Yekaterinburg, Russia

<sup>c</sup> Skolkovo Institute of Science and Technology, 3 Nobel St., Moscow, 143026, Russia

<sup>†</sup> Electronic Supplementary Information (ESI) available: [details of any supplementary information available should be included here]. See DOI: 10.1039/cXCP00000x/

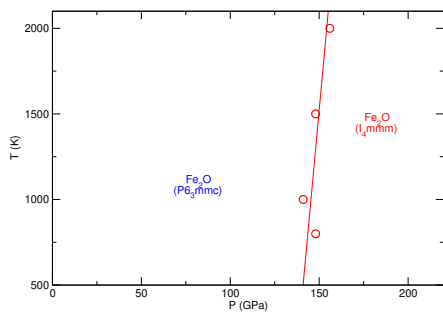

Fig. 5 Phase diagram obtained in DFT+DMFT for  $U=6$  eV. Circles shows the crossing points of  $P6_3/mmc$  and  $I4/mmm$  enthalpies at different temperatures. Dashed line is shown as a guide for eyes.
